# Supplementary material for: Maillard Reaction Intermediates and Related Phytochemicals in Black Garlic Determined by EPR and HPLC Analyses
Source: PubMed Central journal article supplement (PMC7583006; doi:10.3390/molecules25194578), 2020-10-07
Supplement: molecules-25-04578-s001.pdf [file molecules-25-04578-s001.pdf]

## Sample Garlic

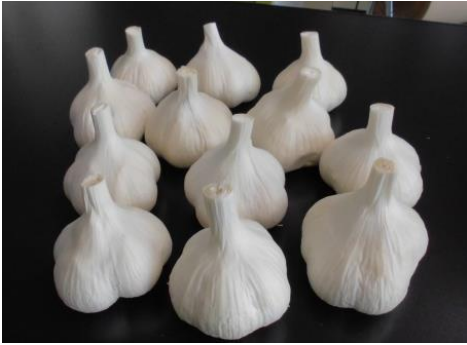

S-1. Garlic bulbs

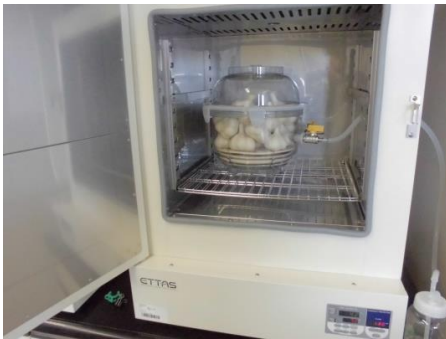

S-1a. Garlic bulbs  
in an incubator

# S-2

## Supplemental data

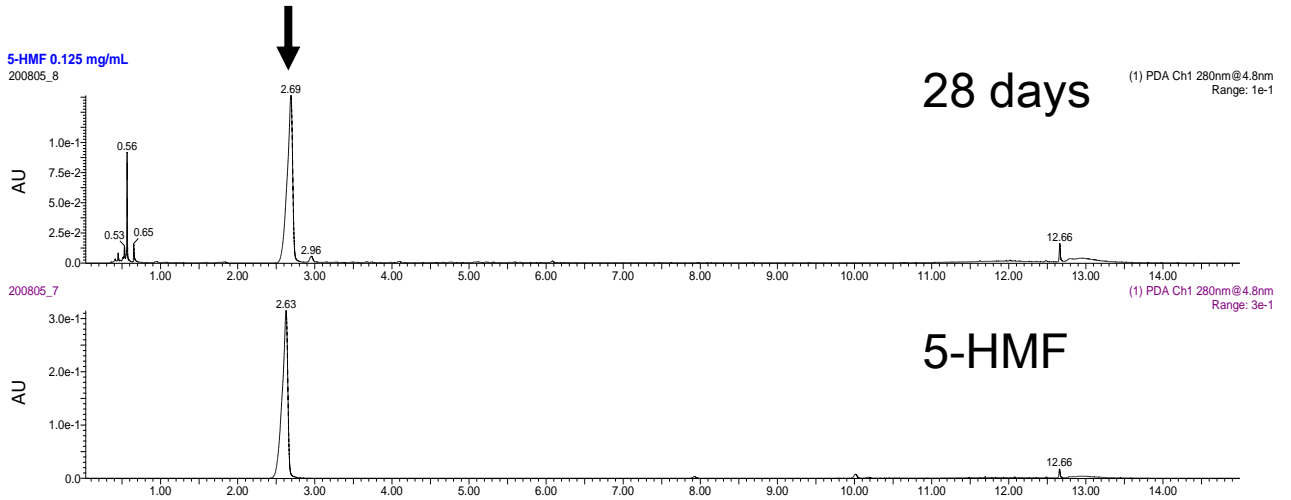

UHPLC-Tof-MS analysis  
280 nm chromatogram

# S-3

## Supplemental data

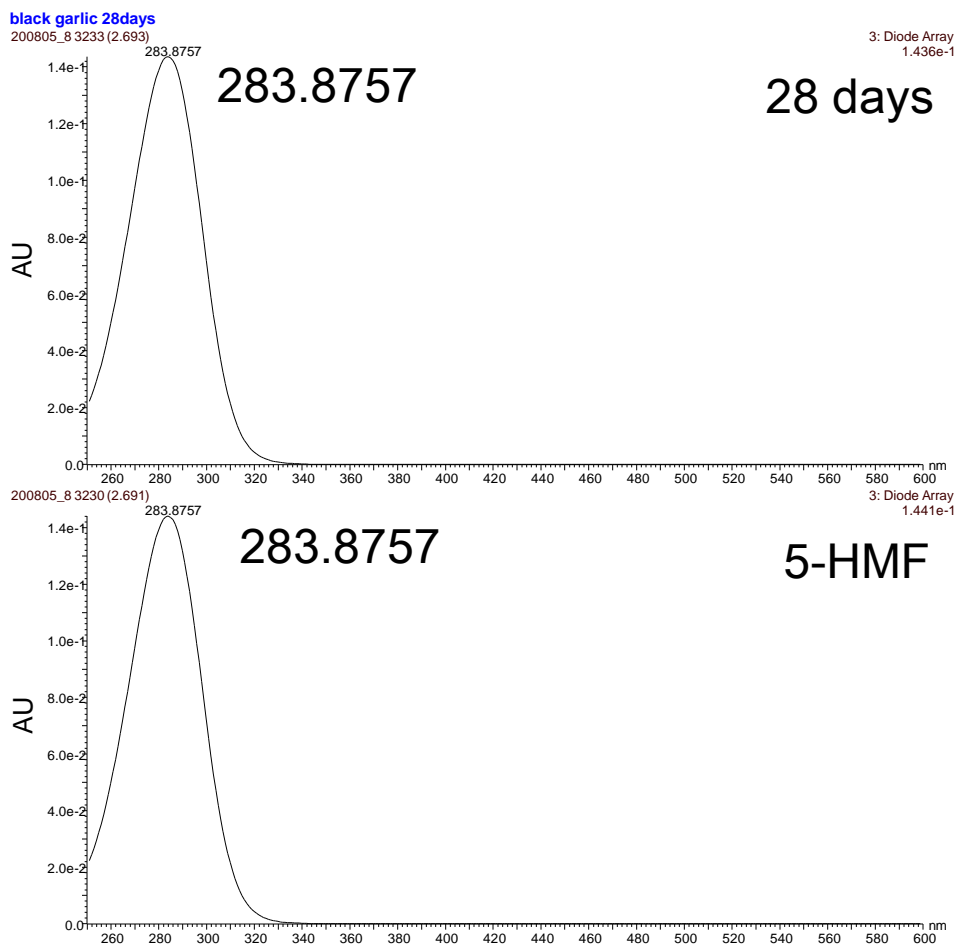

UHPLC-Tof-MS analysis  
Max absorption at the peak

# S-4

## Supplemental data

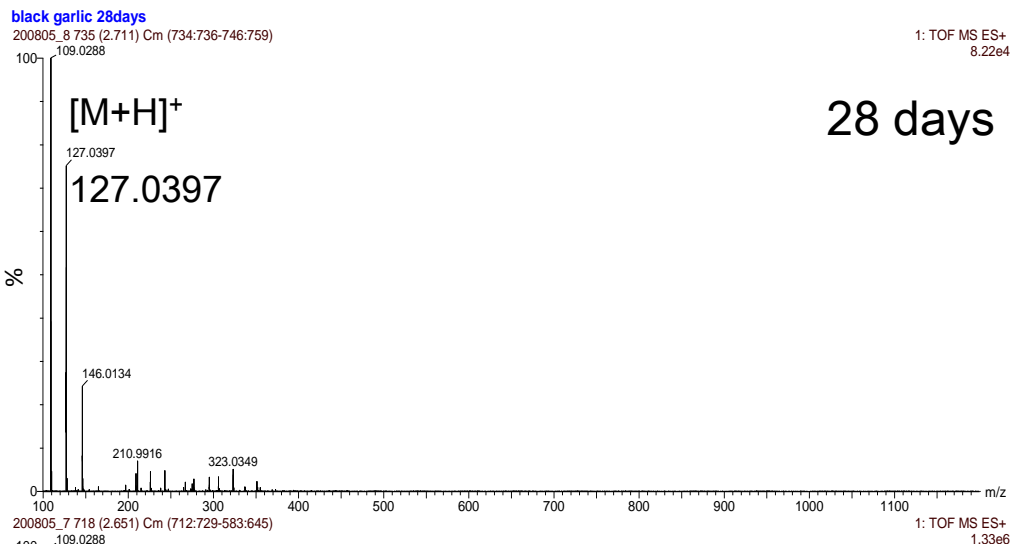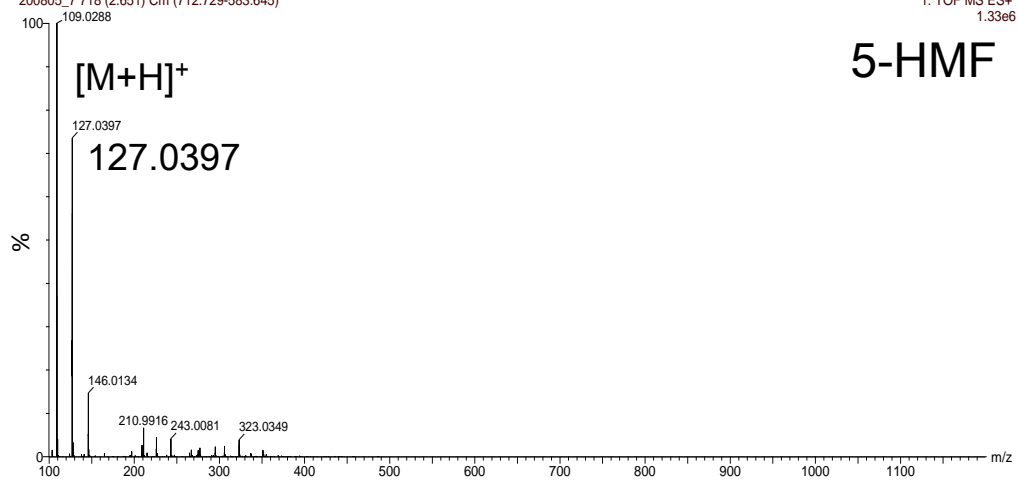

UHPLC-Tof-MS analysis  
MS chromatogram
